# Supplementary material
Source: PubMed Central journal article supplement (PMC2669331)
Supplement: 0809918106_0809918106SI.pdf [file 0809918106_0809918106SI.pdf]

# Supporting Information

Chan et al. 10.1073/pnas.0809918106

Transmembrane

```
Hs : MSAQRLLSNRTSQQSASNSDYTWEEYEEYEIG-PVSFEGGLKAHKYSIVIGFWVGLAVFVIFMFFVLTLLTKTGAPH
Mm : MSAQRLLASNRTSPQSPNSDYTWEEYEEYEIG-PVSFEGGLKAHKYSIVIGFWVGLAVFVIFMFFVLTLLTKTGAPH
Rn : MSAQRLLSNRTSPQSPNSDYTWEEYEEYEIG-PVSFEGGLKAHKYSIVIGFWVGLAVFVIFMFFVLTLLTKTGAPH
Gg : MSALRLLSNRTSQALSNSDYTWEEYEEYEYG-PVSFEGGLKAHKYSIVIGFWVGLAVFVIFMFFVLTLLTKTGAPH
Xt : MSEQTVQTNRTSHKQLNSDYTWEEYEEYEYA-PVSFEGGLKAHKYSIVIGFWVGLAVFVIFMFFVLTLLAKTGAPH
Dr : MPRFQLS-NST---VPHNYEWSYEEYDDEE-PVSFEGGLKAHRYSIIVIGFWVGLAVFVIFMFFVLTLLTKTGAPH

Hs : QDNAESSEKRFMNSFVSDFGKPLESD--KVSFRQGNESRSLFHCYINEVERLDRKACHQTALDSDVQLQEA
Mm : QDNAESSERRFMNSFVSDFGKPLESD--KVSFRQGNESRSLFHCYINEVEHLDRVKVCHQTALDSDVHLQEA
Rn : QDNAESSEKRFMNSFVSDFGKPLESD--KVSFRQGNESRSLFHCYINEVEHLDRVKVCHRRTALDSDVHLQEA
Gg : QNTESSEKRFMNSFVADFGKPLESE--RVFSRQIAEESRSLFHCYINEVEHLDKAQQSQKGPDLSENIHFQEV
Xt : QENVDSLEKQFRMDSFAPDFGRNTEADTDRIE SRNVTEESRSLFHCYINEVDQPERIK--NRNRAMDNELIIQQT
Dr : PEAAEPYEKRMRLTSCADGLGRQRETDGRTGLSRPLLEESRSLFHCYINEEER-EGGRAATDAGALTHGRSGIGN

Hs : IRSSGQPEEELNRLMKFDI PNFVNTDQNY-FGEDDLLISEPPIVLETKPLSQTSHKDLD 205
Mm : SRSSGRPEEELARFMKFDI PNFVNTDQSS-FGEDDLLISEAPVLLNKPVSTSRIDL 206
Rn : IRSSGRPEEELTRFMQFDI PNFVNTDQNS-FGEDDLLISETP-LLENKPVSTSRIDL 205
Gg : SRSSGTLEEDLNCLAKYNI PNFVNTDQNSLGEGLLISQPPRVLESKMAMQSSHRILD 204
Xt : IRNS-KVEEDINMIKFNIPNFVNTDQSSIGDDLLLYDPPMNLNKAVHTSLCDFM- 204
Dr : SRGQVRAEREALLAHENIPNFVNSELNSALGDEDLLLGDPPPIIMEEARP-CTHHIID 203
```

Fig. S1. Protein alignment of MRAP2 orthologues, showing conservation of MRAP2 across vertebrates. Hs, *homo sapiens*; Mm, *Mus musculus*; Rn, *Rattus norvegicus*; Gg, *Gallus gallus*; Xt, *Xenopus tropicalis*; Dr, *Danio rerio*.

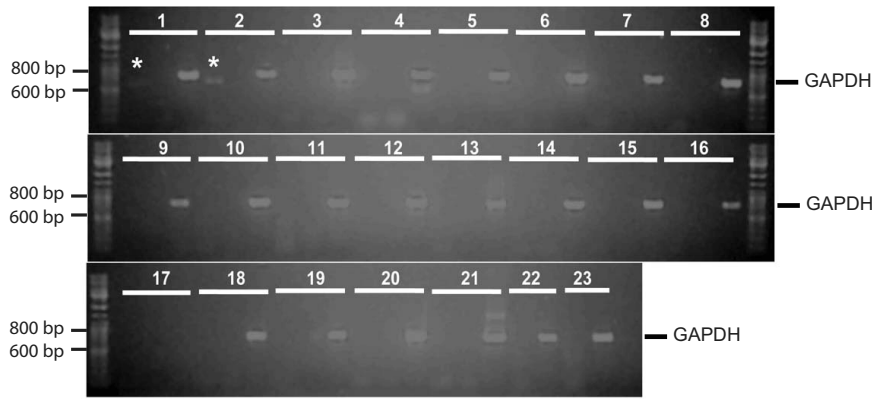

**Fig. S2.** MRAP2 mRNA expression in human tissues was determined by RT-PCR analysis. Full-length MRAP2 mRNA (618 bp, indicated by asterisk) was only detected in human adrenal and brain. PCR products were sequenced to confirm MRAP2 transcript.

**(a) AT1 receptor**

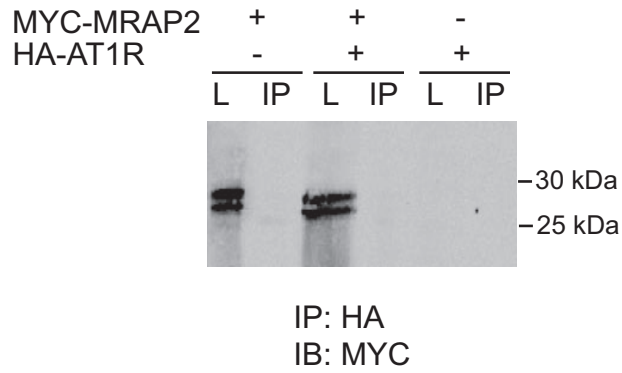

**(b) Beta2-adrenergic receptor**

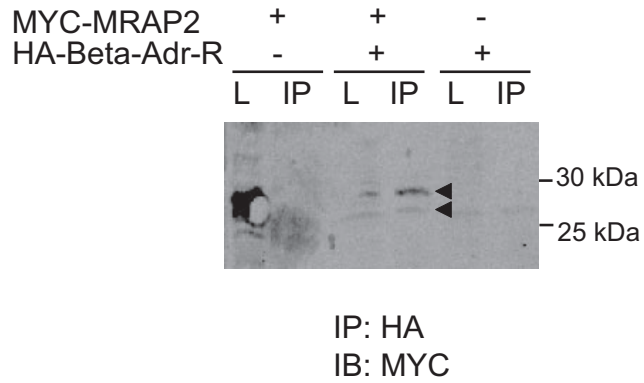

**(c) Calcitonin-like receptor**

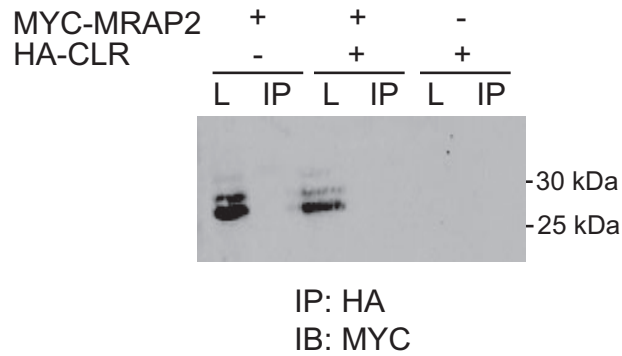

**Fig. S3.** Specificity of the interaction between MRAP2 and other G protein-coupled receptors. The HA-tagged AT1R, the BAR, or the CLR were cotransfected into CHO cells with the MYC-tagged MRAP2 as described for the MCRs, followed by Co-IP as shown. MRAP2 coprecipitated with the BAR (arrowheads) but not with the other receptors. IB, immunoblotting.

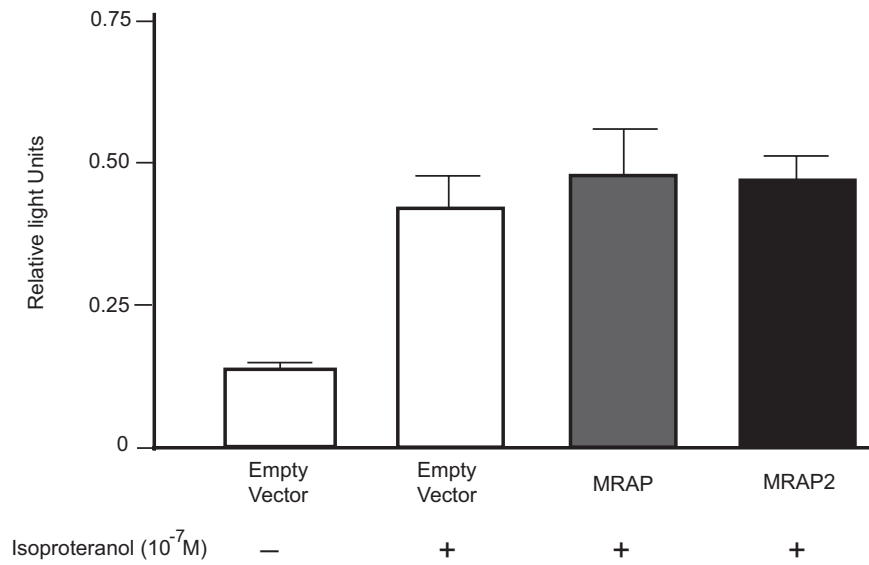

**Fig. S4.** Influence of MRAP or MRAP2 on cAMP generation by the BAR in response to isoproterenol (10<sup>-7</sup>M). CHO cells were transfected with the BAR expression vector and either empty vector, MRAP, or MRAP2 expression vectors. cAMP signal transduction was measured using a cAMP luciferase reporter construct as described elsewhere (1, 2). 1. Cooray SN, et al. (2008) The melanocortin 2 receptor accessory protein exists as a homodimer and is essential for the function of the melanocortin 2 receptor in the mouse y1 cell line. *Endocrinology* 149:1935–1941. 2. Webb TR, et al. (2009) Distinct melanocortin 2 receptor accessory protein domains are required for melanocortin 2 receptor interaction and promotion of receptor trafficking. *Endocrinology* 150:720–726.

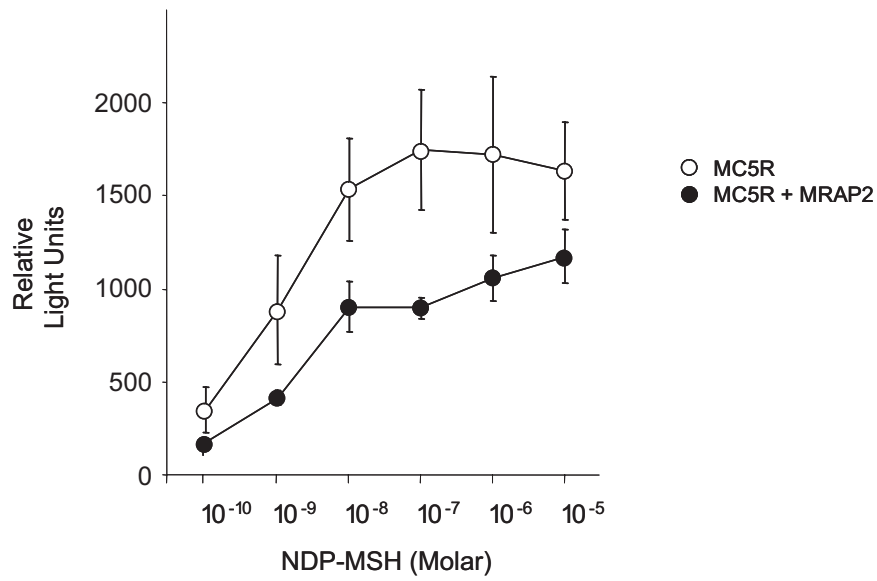

**Fig. S5.** MC5R dose-response curve in the presence or absence of MRAP2. CHO cells were transfected with the MC5R with or without the MRAP2 expression vector. After 24 h cells were stimulated with various concentrations of NDP-MSH. cAMP signal generation was measured using a cAMP luciferase reporter assay as described previously (1, 2). Results are the mean  $\pm$  SD of 2 independent experiments. 1. Cooray SN, et al. (2008) The melanocortin 2 receptor accessory protein exists as a homodimer and is essential for the function of the melanocortin 2 receptor in the mouse  $\gamma$ 1 cell line. *Endocrinology* 149:1935–1941. 2. Webb TR, et al. (2009) Distinct melanocortin 2 receptor accessory protein domains are required for melanocortin 2 receptor interaction and promotion of receptor trafficking. *Endocrinology* 150:720–726.

**Table S1. Primers used in study**

| Primer     | Forward                                                         | Reverse                                                   |
|------------|-----------------------------------------------------------------|-----------------------------------------------------------|
| MRAP2      | 5' ATGTCGCCCCAGAGGTTA 3'                                        | 5' TCAATCCAGGTCTTTGTG 3'                                  |
| MRAP2-FLAG | 5'atcggattcatgtccgccagaggta 3'                                  | 5' aatctcgagtcacttgatcgcgctcttgtagtcatccaggtctttgtgtga 3' |
| MYC-MRAP2  | 5' atcggattcatggagcagaaaactcatctgaagaggatctgatgtccgccagaggta 3' | 5' aatctcgagtcaatccaggtctttgtgtga 3'                      |
| N9Q-FLAG   | 5' ctcacaaaagacctggattagtagacaaggacgacgatgac 3'                 | 3' gagtggtttctggacctaatcatgttctgctgctactg 5'              |
| MRAP-FLAG  | 5' ACGCTGAAAGCTTAGTG CCACAGACATG 3'                             | 5' ACCAGTTGAA TTCGCTATGGCCACGAT 3'                        |
